# Supplementary material for: Physicochemical Profile, Antioxidant and Antimicrobial Activities of Honeys Produced in Minas Gerais (Brazil)
Source: MDPI journal article supplement (doi:10.3390/antibiotics11101429), 2022-10-18
Supplement: s1 [file s1]

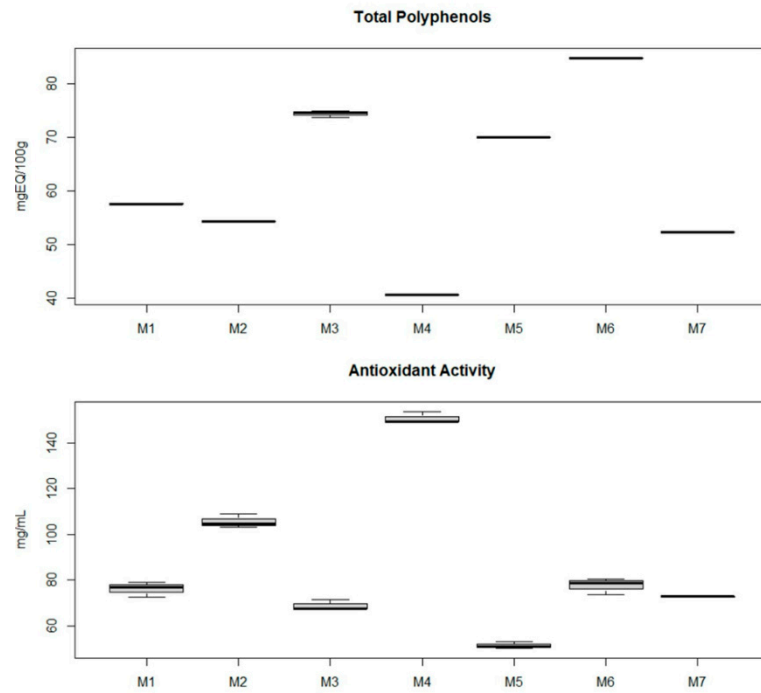

**Figure S1.** Boxplot pattern of honeys in relation to total polyphenols analysis and antioxidant activity.

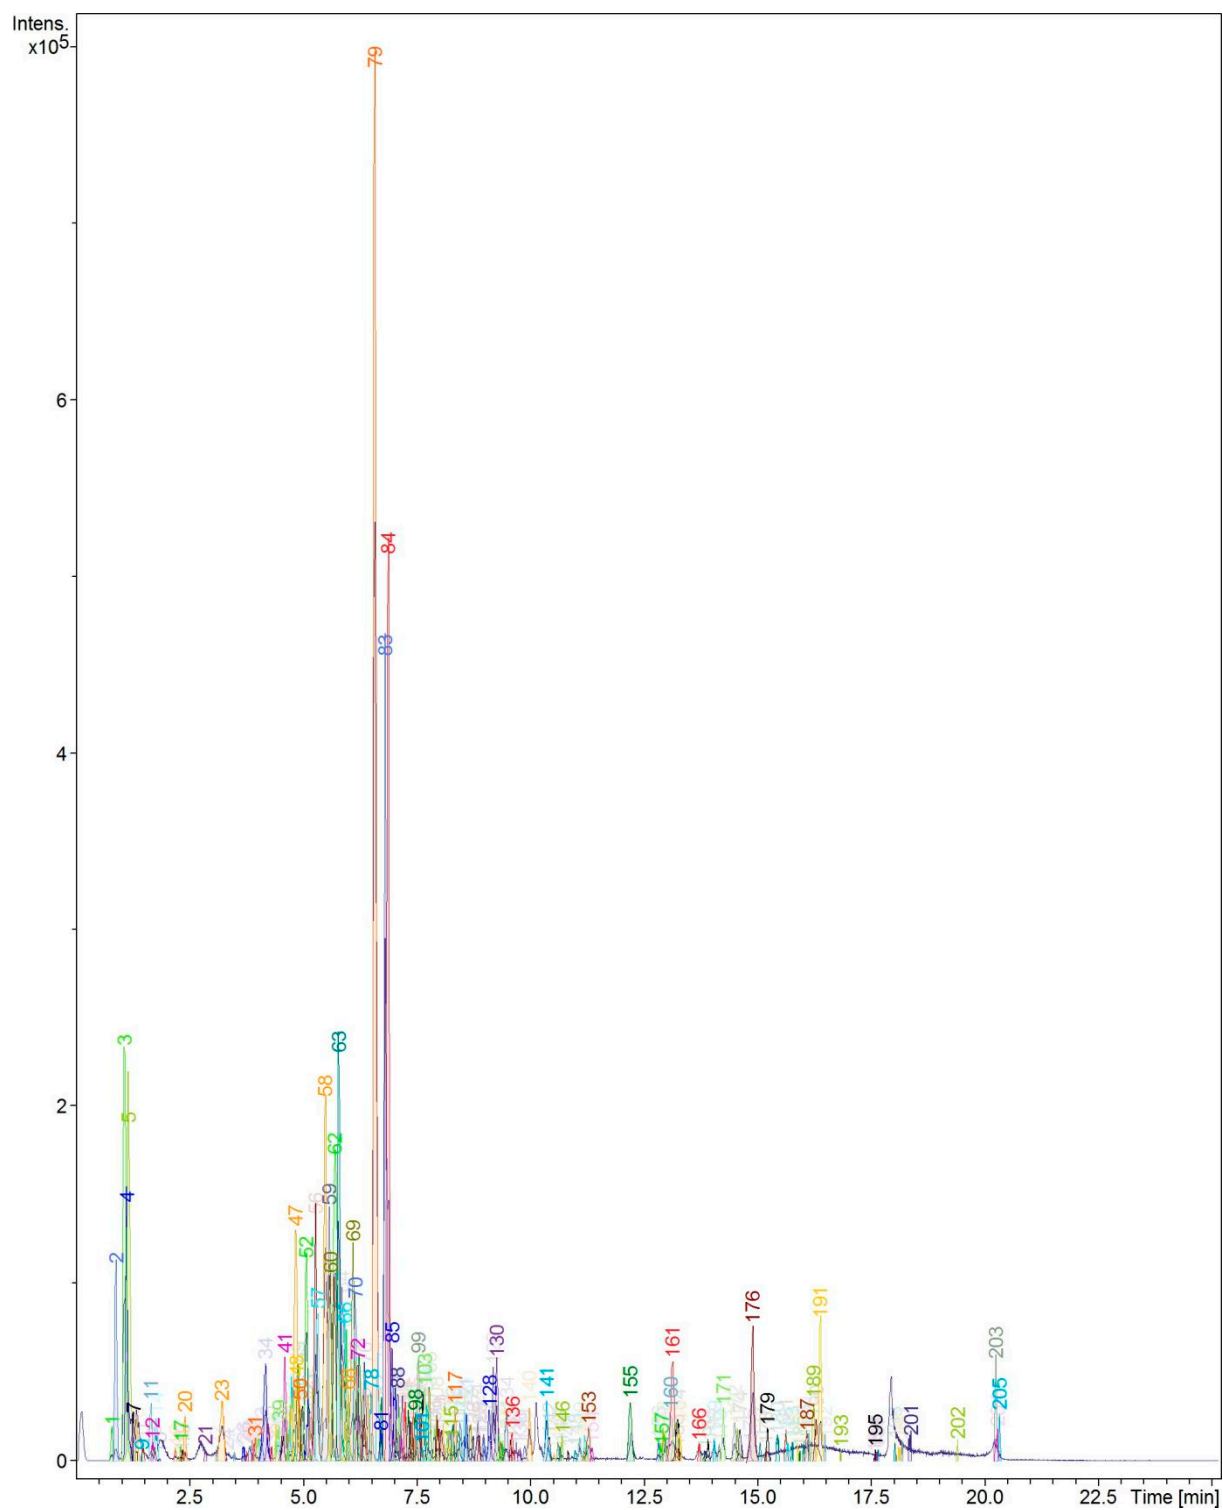

Figure S2. UHPLC chromatographic profile of Betônica honey

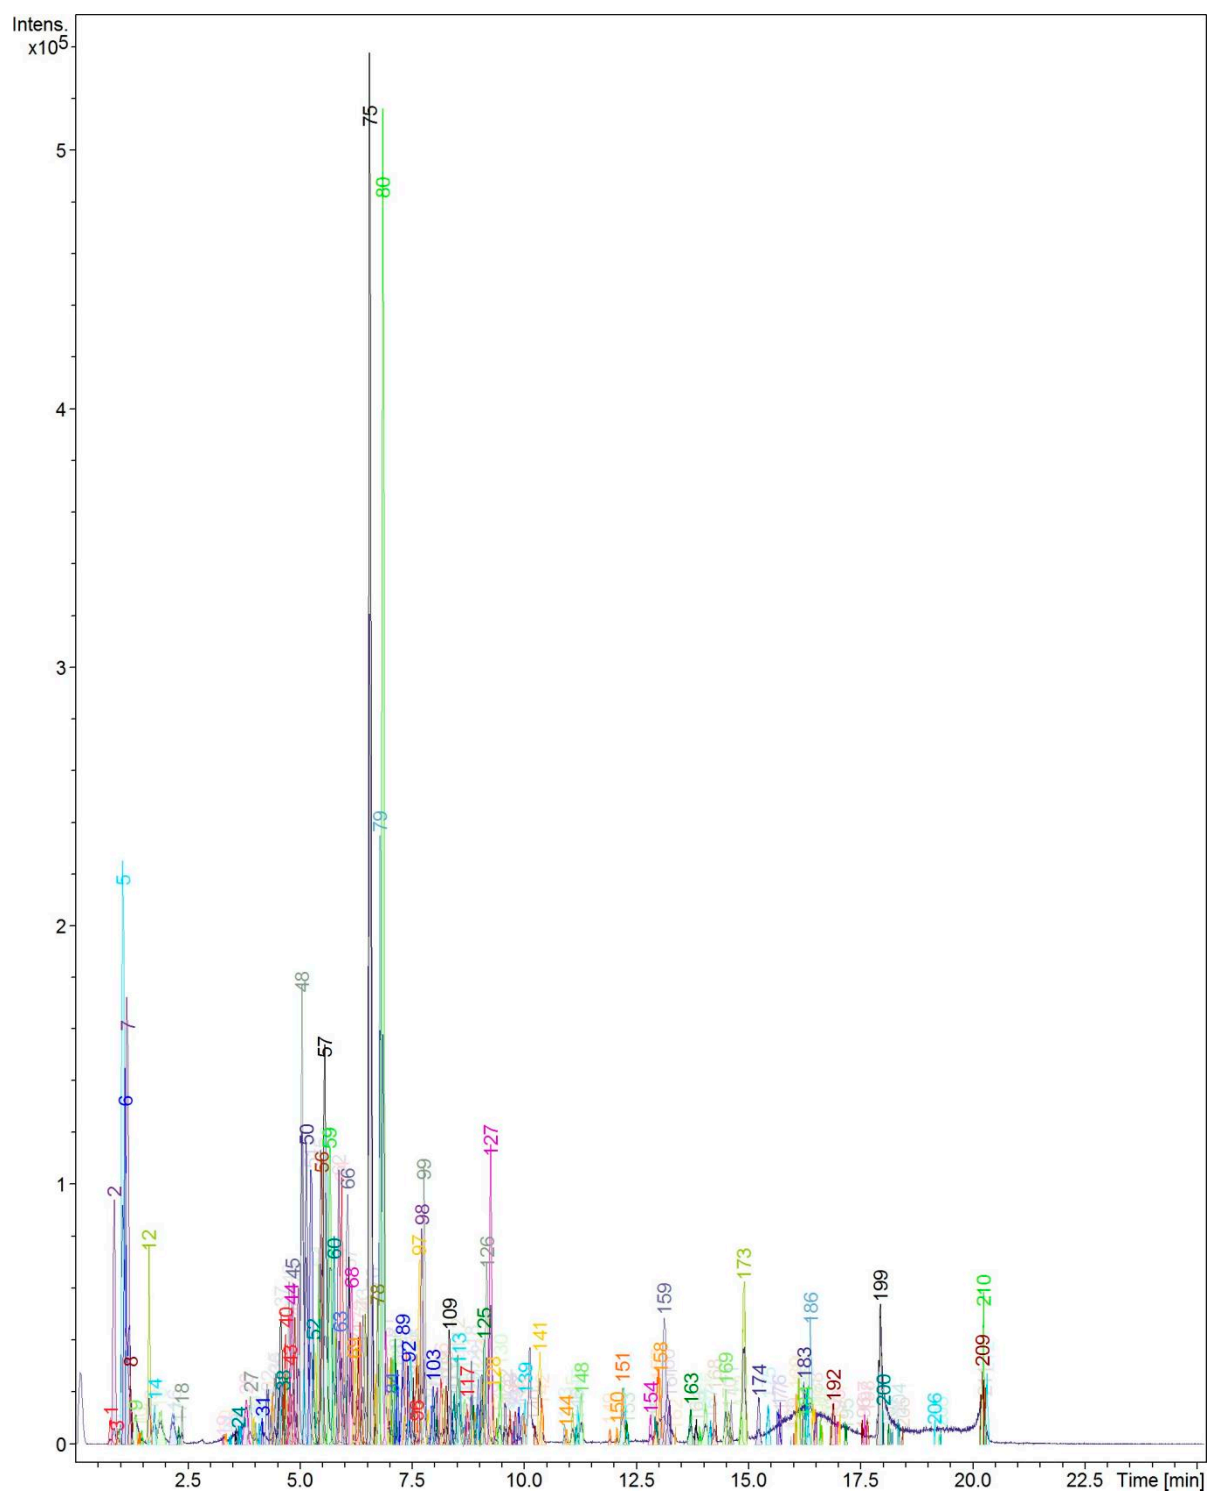

Figure S3. UHPLC chromatographic profile of Pequi honey.

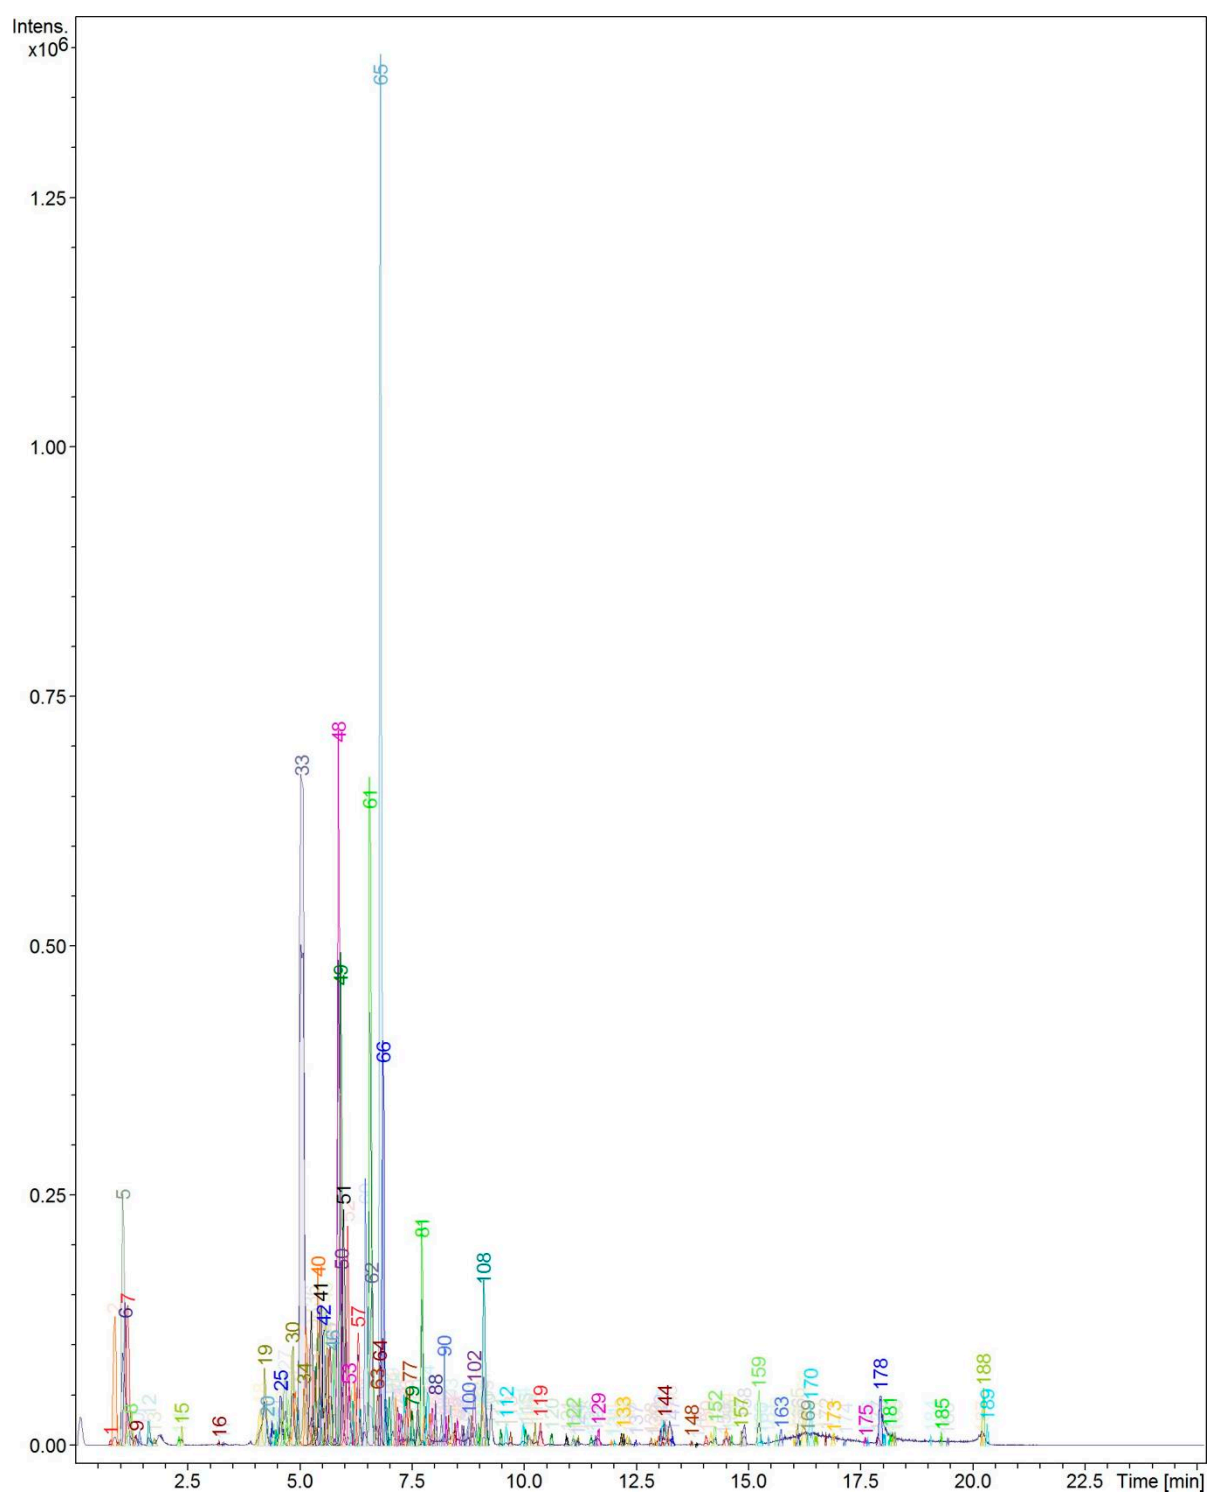

**Figure S4.** UHPLC chromatographic profile of Aroeira honey.

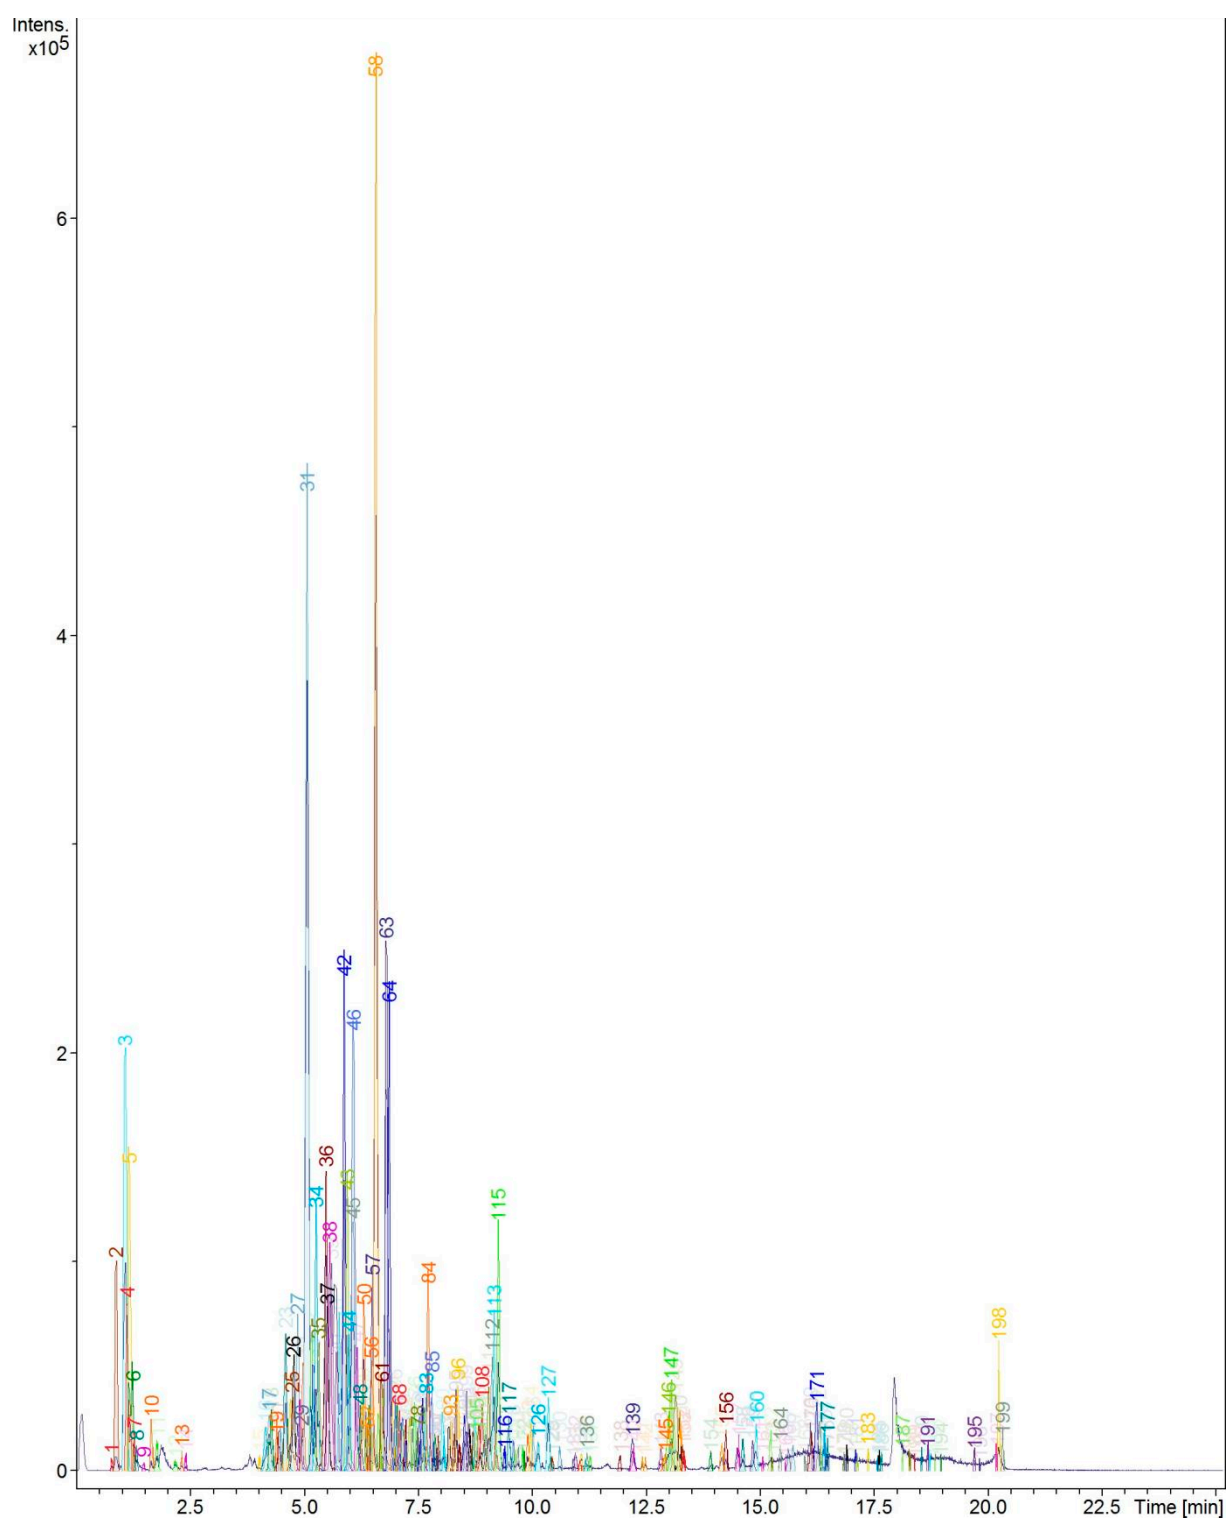

Figure S5. UHPLC chromatographic profile of Cipó-uva honey.

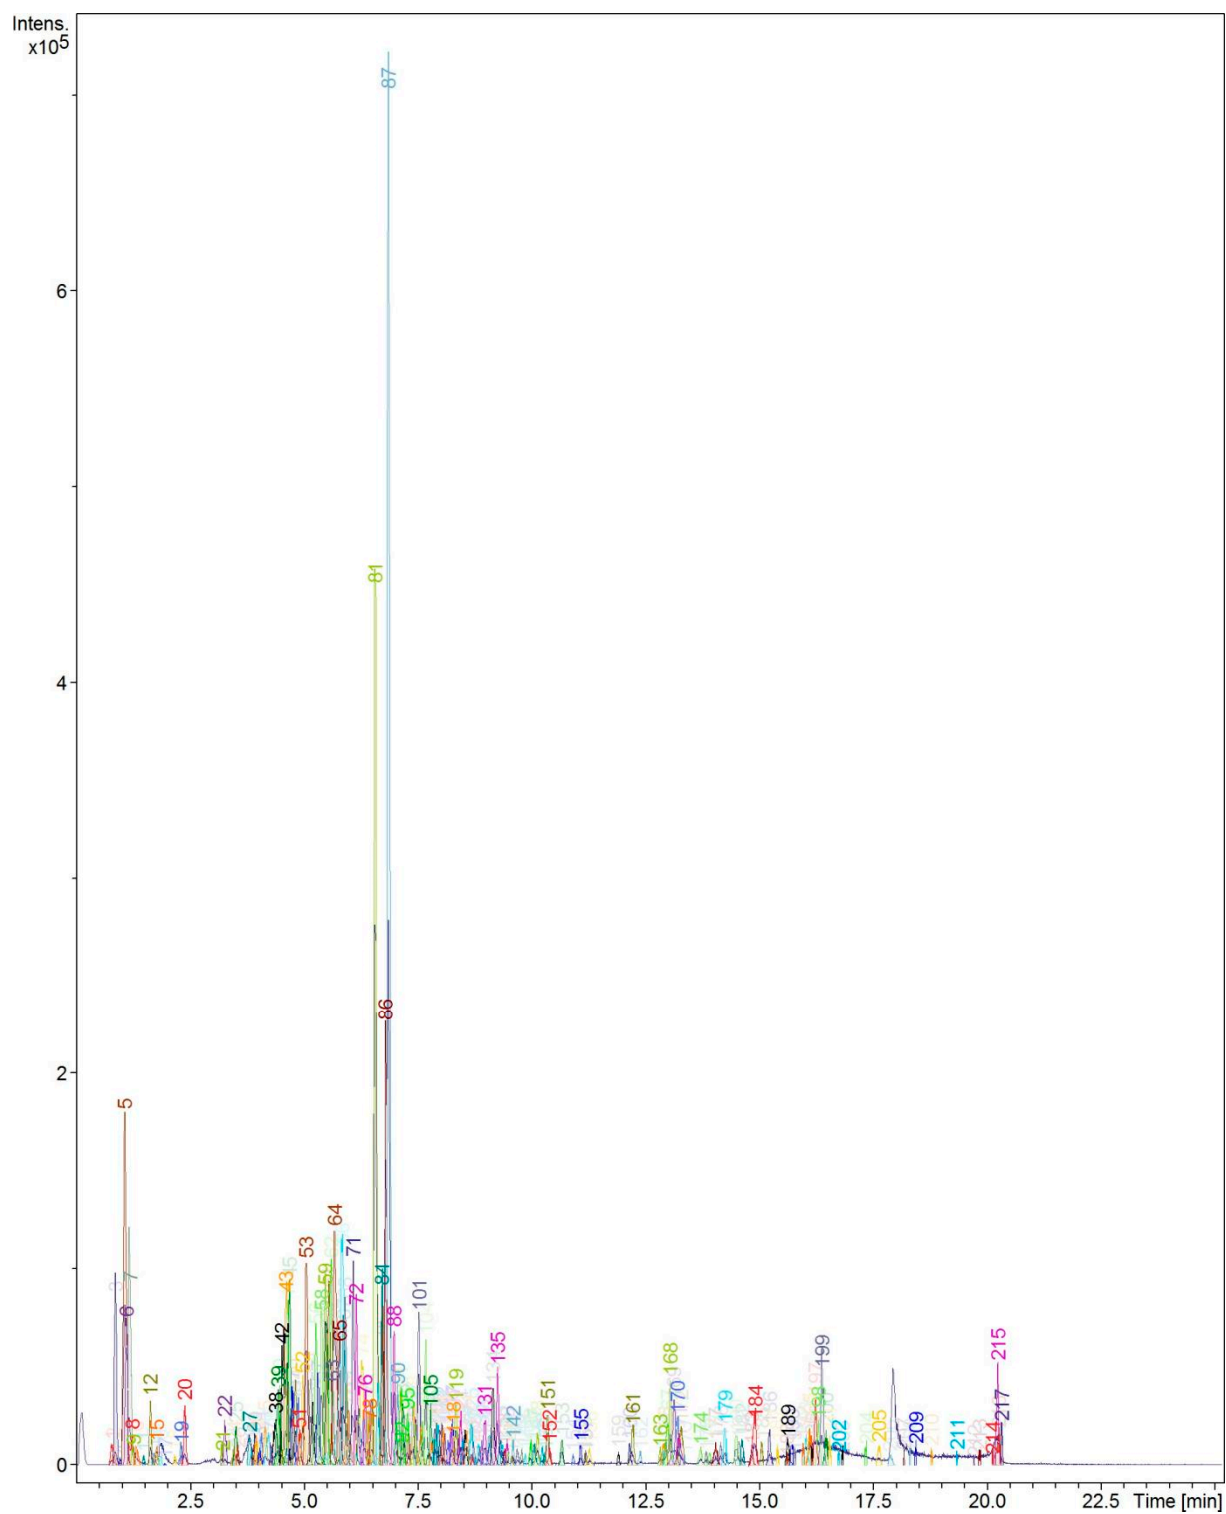

Figure S6. UHPLC chromatographic profile of Coffee honey.

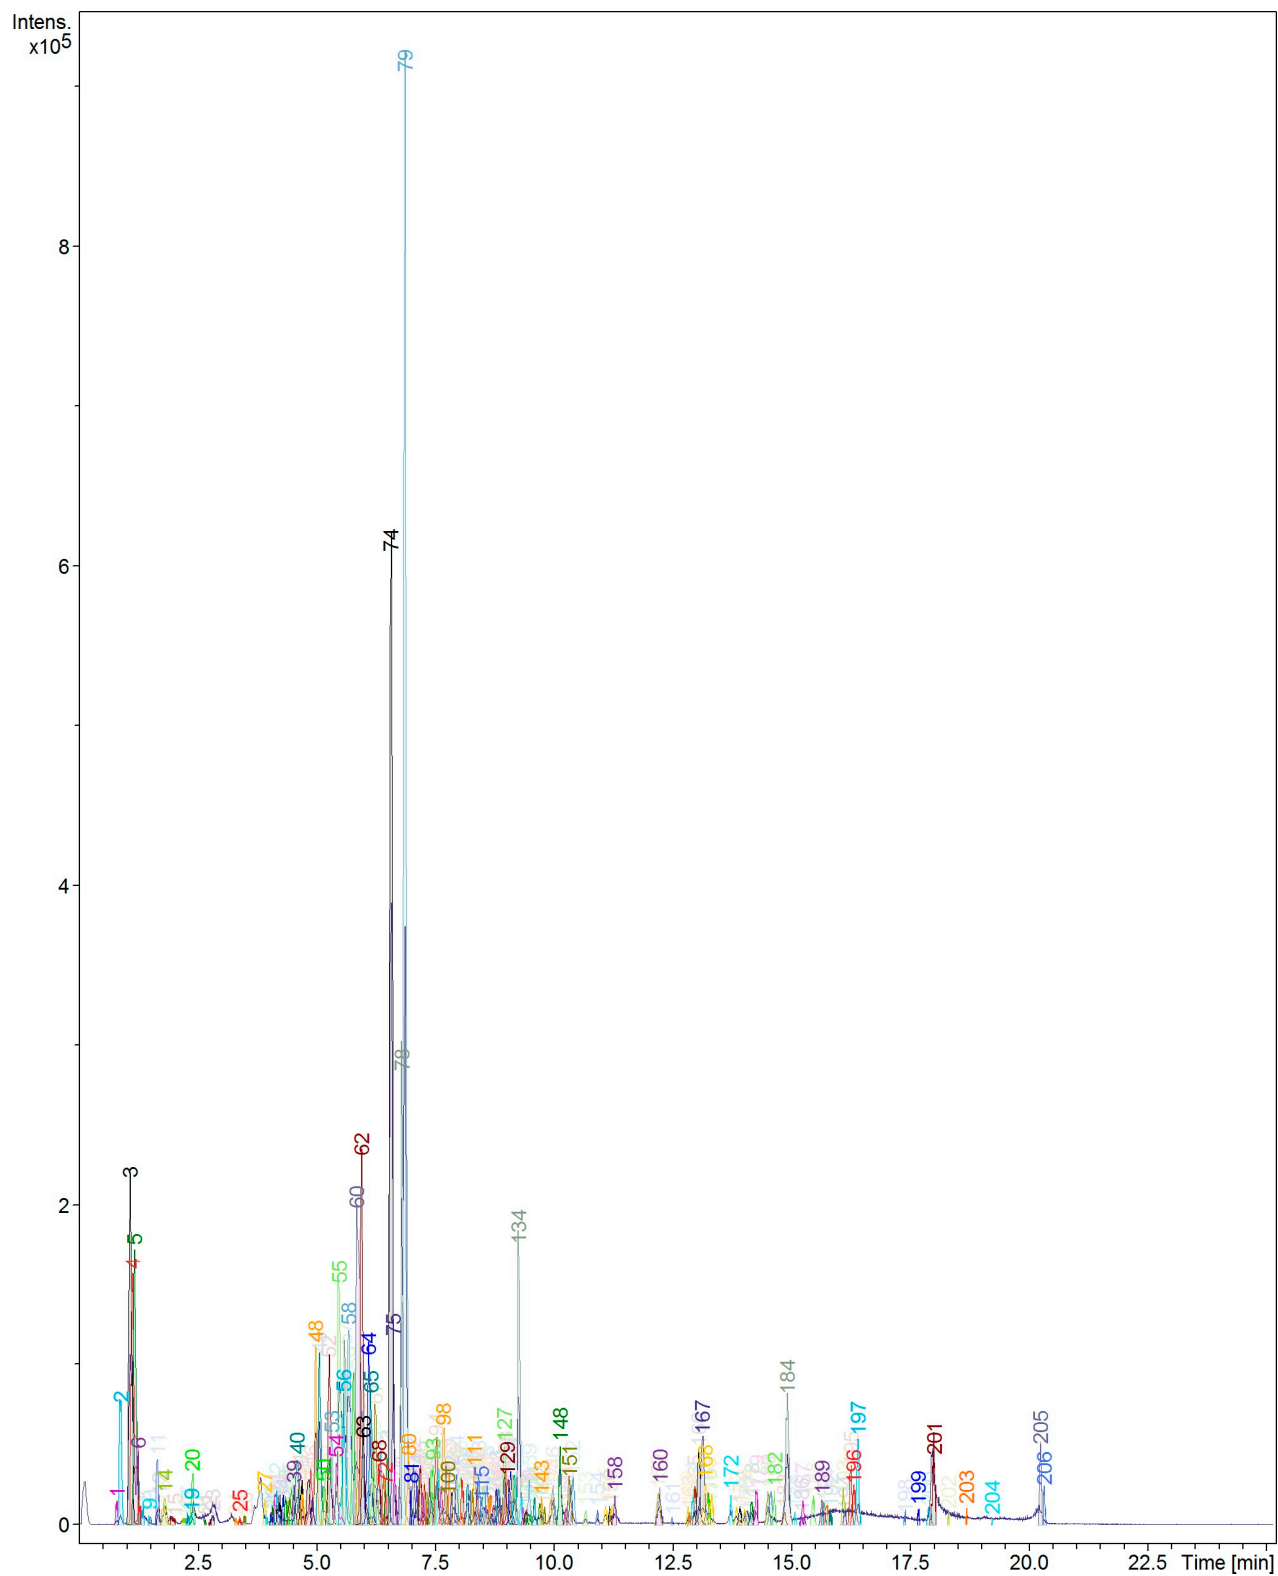

Figure S7. UHPLC chromatographic profile of Velame honey.

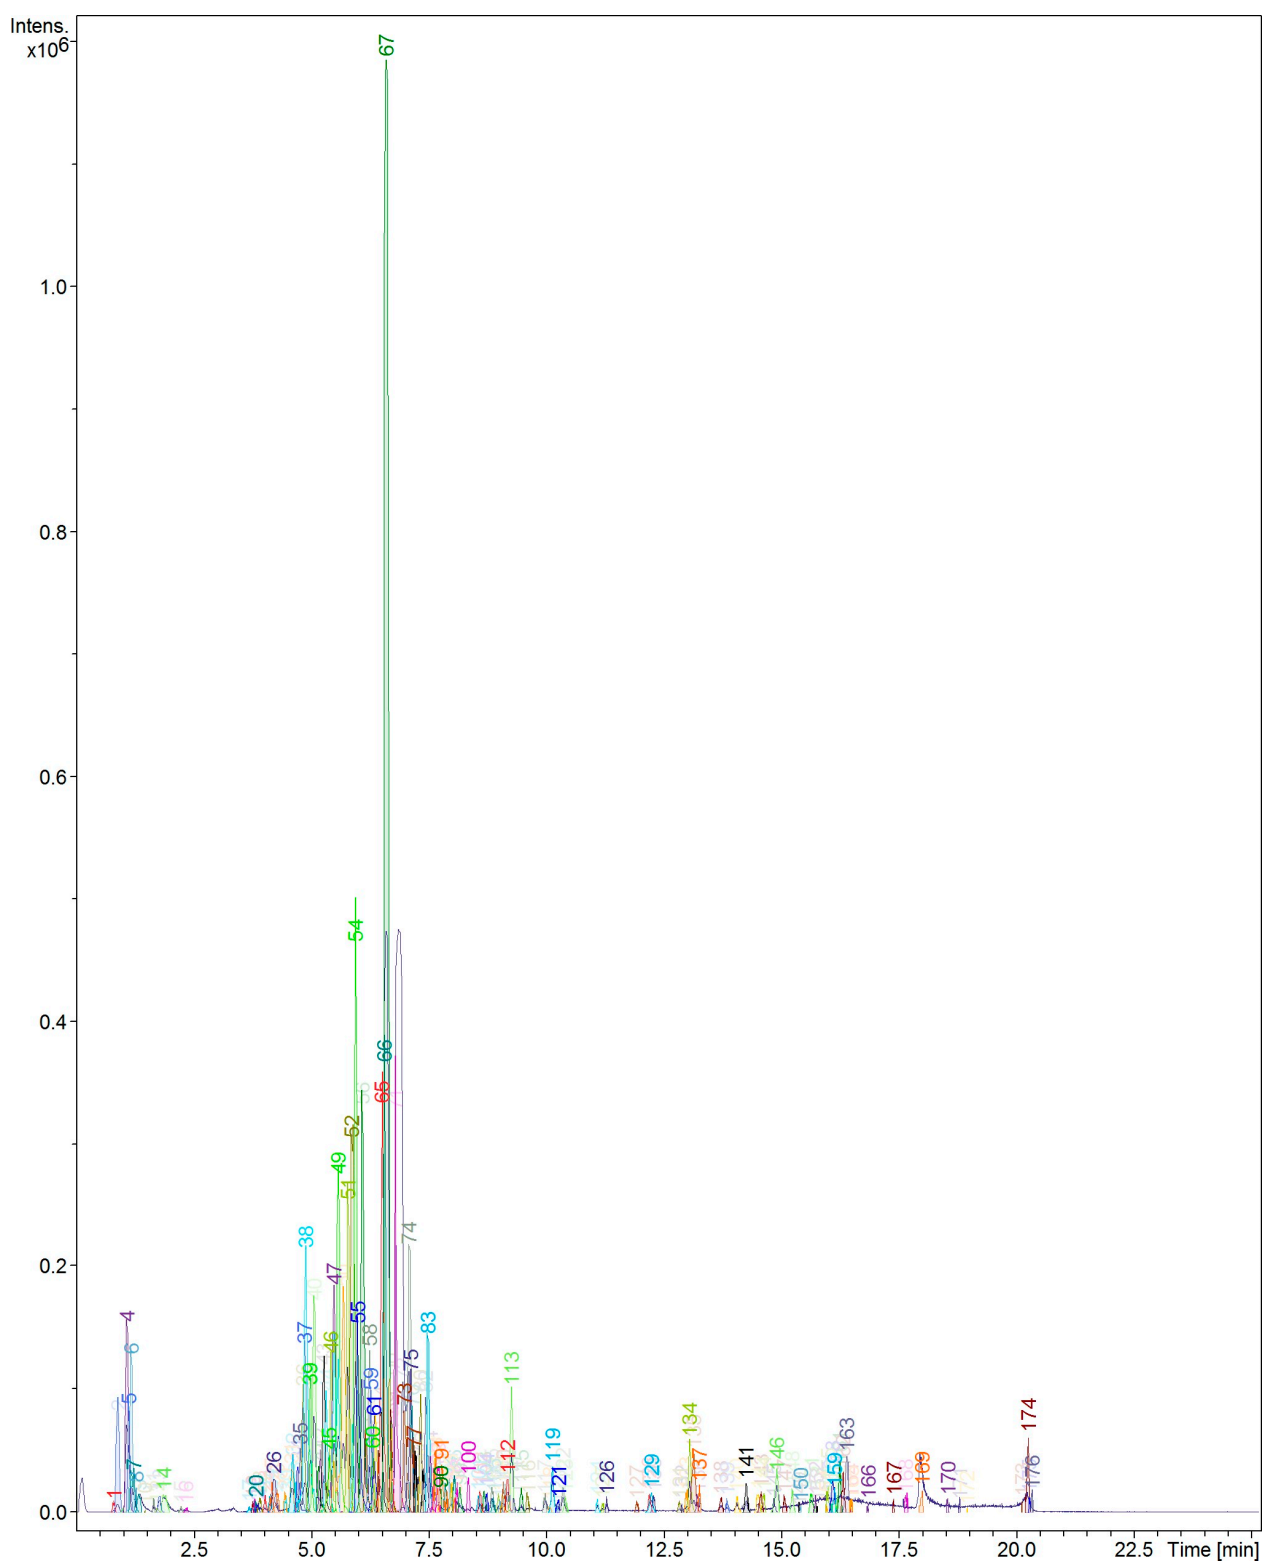

**Figure S8.** UHPLC chromatographic profile of Plyfloral honey.
